# Supplementary material for: The effect of microenvironmental viscosity on the emergence of colon cancer cell resistance to doxorubicin
Source: Royal Society of Chemistry journal article supplement (doi:10.1039/d4tb02334j), 2025-01-01
Supplement: d4tb02334j1.pdf [file d4tb02334j1.pdf]

## Effect of microenvironmental viscosity on the emergence of colon cancer cell resistance to doxorubicin

Tianjiao Zeng<sup>ab</sup>, Chengyu Lu<sup>ab</sup>, Man Wang<sup>ab</sup>, Huajian Chen<sup>a</sup>, Toru Yoshitomi<sup>a</sup>, Naoki Kawazoe<sup>a</sup>, Yingnan Yang<sup>c</sup>, Guoping Chen<sup>\*ab</sup>

<sup>a</sup> Research Center for Macromolecules and Biomaterials, National Institute for Materials Science, Ibaraki 305-0044, Japan.

<sup>b</sup> Graduate School of Science and Technology, University of Tsukuba, Ibaraki 305-8577, Japan.

<sup>c</sup> Graduate School of Life and Environment Science, University of Tsukuba, 1-1-1 Tennodai, Tsukuba, Ibaraki 305-8572, Japan.

\* Correspondence: [Guoping.CHEN@nims.go.jp](mailto:Guoping.CHEN@nims.go.jp); Tel: +81-29-860-4496

### Supplementary data:

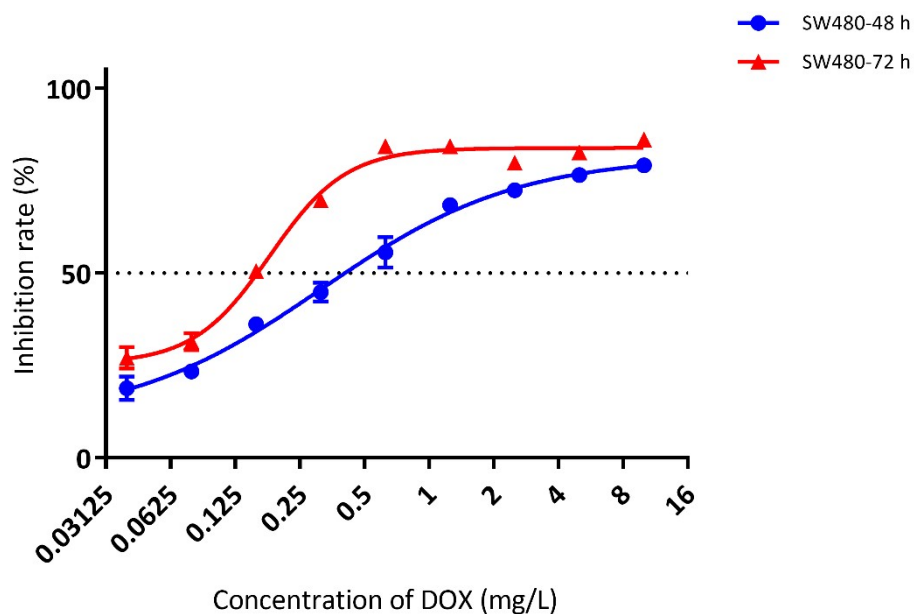

**Fig. S1** Inhibition effect of DOX to SW480 cell line after culture for 48 h and 72 h. Data are the means  $\pm$  S.D. (n = 4).

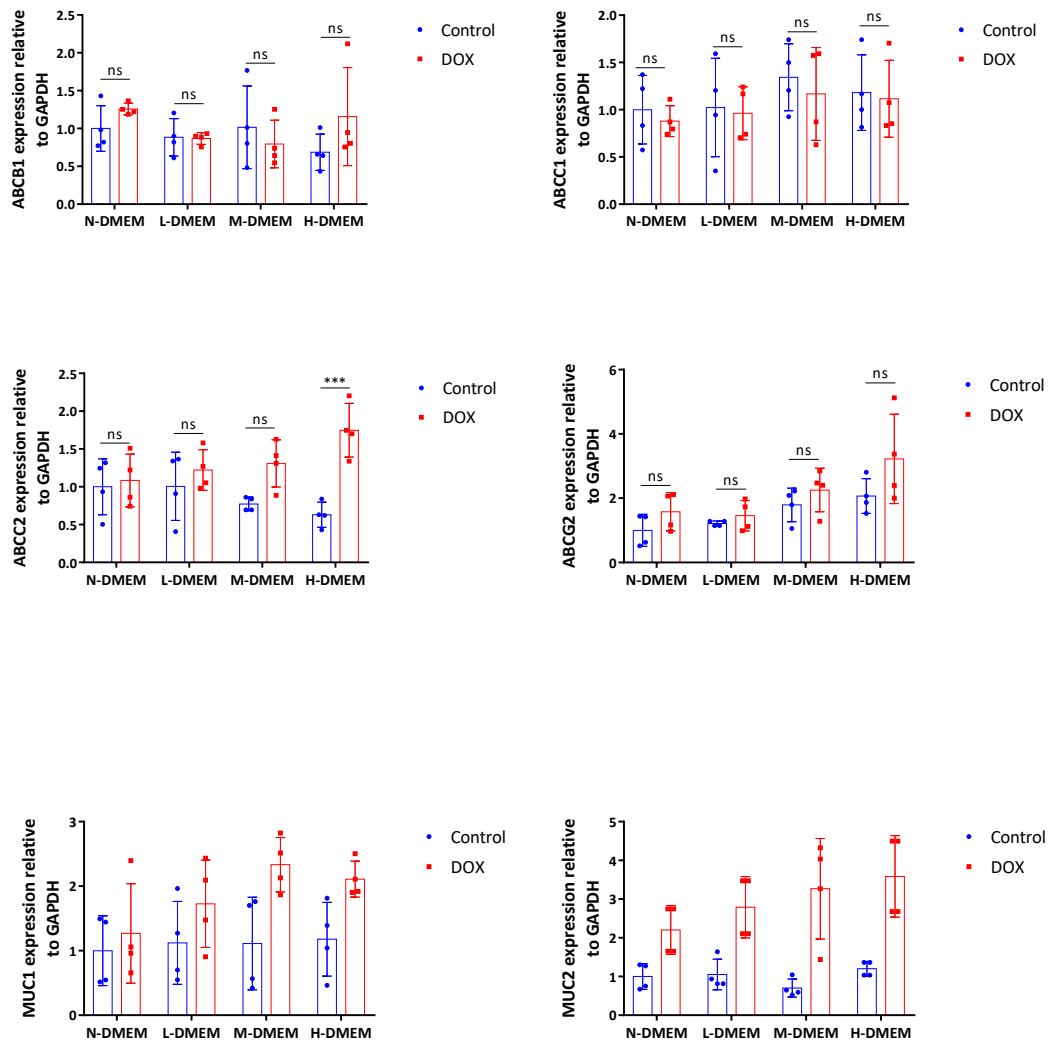

**Fig. S2** Comparison of expression levels of chemoresistance-related genes between control group and DOX group of the same viscosity. Quantified expression levels of ABCB1 (a), ABCC1 (b), ABCC2 (c), ABCG2 (d), MUC1 (e), and MUC2 (f) mRNAs in colon cancer cells after 72 h culture in N-DMEM, L-DMEM, M-DMEM and H-DMEM media without (control group) or with 0.1 mg L<sup>-1</sup> DOX (DOX group). The data relative to GAPDH were normalized to the expression level in N-DMEM. Data are the means ± S.D. (n = 4). Significant differences: \* p < 0.05. ns = no significant difference.

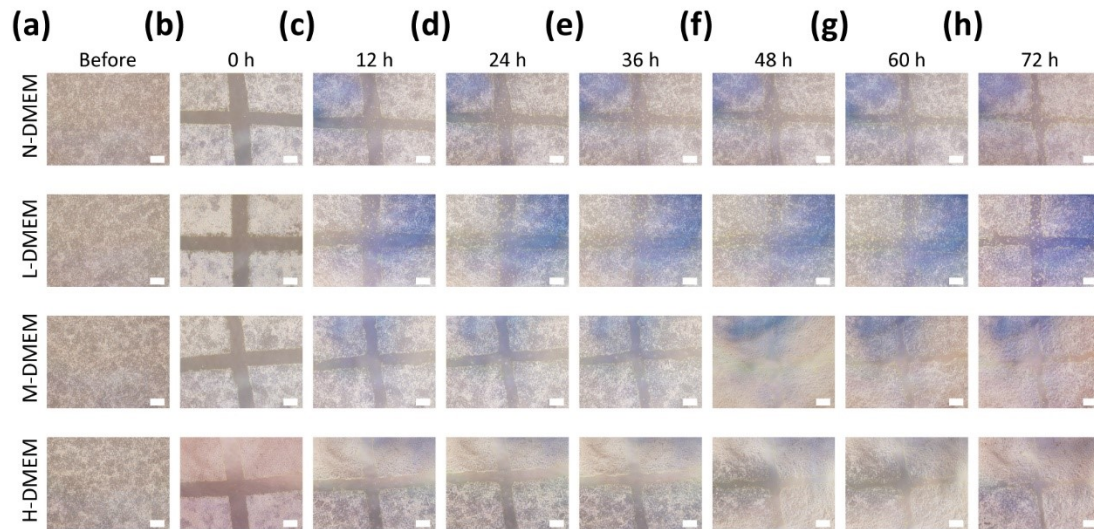

**Fig. S3** Effect of viscosity on cell migration ability as demonstrated by a scratch test. Photomicrographs showing cell migration in the N-DMEM, L-DMEM, M-DMEM and H-DMEM without addition of DOX (a-h). Scale bar: 500  $\mu$ m.

**Table S1** Primer sequence of the genes used for RT-qPCR analysis.

| Gene symbol | Forward primer             | Reverse primer              |
|-------------|----------------------------|-----------------------------|
| GAPDH       | GGAGCGAGATCCCTCCAAAAT      | GGCTGTTGTCATACTTCTCATGG     |
| ABCB1       | GGGAGCTTAACACCCGACTTA      | GCCAAAATCACAAGGGTTAGCT<br>T |
| ABCC1       | TTACTCATTAGCTCGTCTTGT<br>C | CAGGGATTAGGGTCGTGGAT        |
| ABCC2       | CCATAGCTTCATTCTGAGTAG<br>C | TCAGAGGACGCTTGTAGCCTT       |
| ABCG2       | ACGAACGGATTAACAGGGTCA      | CTCCAGACACACCACGGAT         |
| CDKN1A      | CGATGGAACCTCGACTTTGTCA     | GCACAAGGGTACAAGACAGTG       |
